# Supplementary material
Source: ML conference proceedings conference paper supplement (https://openreview.net/forum?id=vuzL4ImPKW)
Supplement: supplementary_material [file Appendix.pdf › Appendix.pdf]

## A APPENDIX

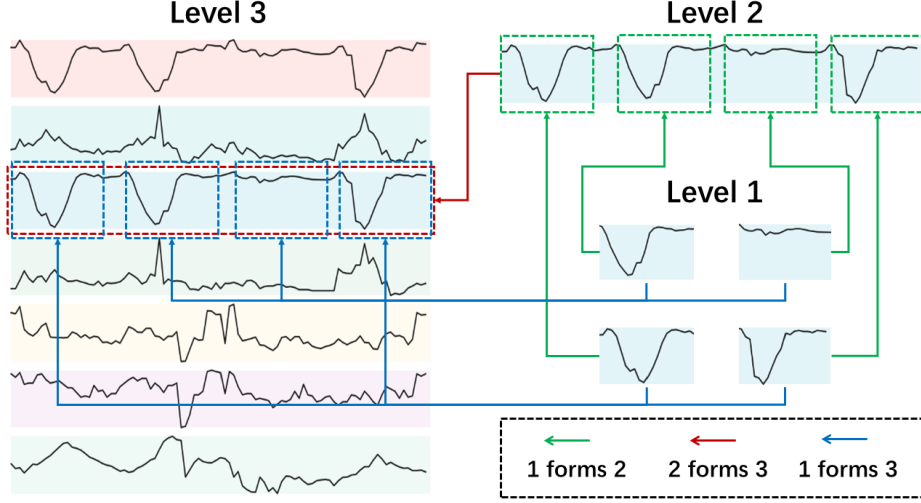

Figure 1: The ‘‘part-forms-whole’’ hierarchy in time series.

Table 1: Experiments with three recent strong baselines (TimePro, OLinear, and TimeMixer++) and the results for all models on the four PEMS subsets are included. The look-back window size is set to 96 for all experiments. The prediction horizons are  $\{12, 24, 48, 96\}$  for the PEMS subsets and  $\{96, 192, 336, 720\}$  for all other datasets.

| Model    | HyperTime    |              | TimePro      |              | OLinear      |              | TimeXer      |              | SOFTS        |       | TimeMixer++  |              | iTransformer |              | MSGNet |       |
|----------|--------------|--------------|--------------|--------------|--------------|--------------|--------------|--------------|--------------|-------|--------------|--------------|--------------|--------------|--------|-------|
| Metric   | MSE          | MAE          | MSE          | MAE          | MSE          | MAE          | MSE          | MAE          | MSE          | MAE   | MSE          | MAE          | MSE          | MAE          | MSE    | MAE   |
| ETTh1    | <b>0.438</b> | <b>0.433</b> | <b>0.446</b> | 0.442        | 0.448        | 0.445        | 0.450        | <b>0.440</b> | 0.457        | 0.446 | 0.453        | 0.447        | 0.448        | <b>0.440</b> | 0.497  | 0.483 |
| ETTh2    | <b>0.374</b> | <b>0.397</b> | 0.379        | 0.403        | 0.384        | 0.410        | 0.382        | 0.405        | 0.382        | 0.407 | <b>0.376</b> | <b>0.404</b> | 0.381        | 0.406        | 0.399  | 0.421 |
| ETTm1    | <b>0.383</b> | <b>0.396</b> | 0.395        | 0.402        | 0.394        | <b>0.400</b> | 0.392        | 0.402        | 0.398        | 0.404 | <b>0.389</b> | 0.401        | 0.407        | 0.410        | 0.427  | 0.438 |
| ETTm2    | <b>0.276</b> | <b>0.322</b> | 0.284        | 0.329        | 0.283        | 0.328        | 0.282        | <b>0.327</b> | 0.288        | 0.331 | <b>0.281</b> | 0.329        | 0.287        | 0.331        | 0.298  | 0.332 |
| Exchange | <b>0.348</b> | <b>0.395</b> | 0.354        | 0.401        | <b>0.346</b> | 0.407        | 0.374        | 0.411        | 0.361        | 0.405 | 0.351        | <b>0.397</b> | 0.360        | 0.405        | 0.360  | 0.406 |
| Weather  | 0.251        | <b>0.274</b> | 0.255        | 0.278        | 0.252        | <b>0.273</b> | <b>0.247</b> | 0.276        | 0.257        | 0.278 | <b>0.245</b> | 0.275        | 0.260        | 0.281        | 0.254  | 0.279 |
| ECL      | <b>0.179</b> | <b>0.274</b> | 0.182        | 0.275        | <b>0.180</b> | <b>0.274</b> | 0.184        | 0.280        | 0.190        | 0.276 | 0.184        | 0.279        | 0.185        | 0.275        | 0.195  | 0.298 |
| Traffic  | <b>0.453</b> | <b>0.305</b> | 0.467        | 0.313        | 0.489        | <b>0.307</b> | 0.483        | 0.317        | <b>0.466</b> | 0.310 | 0.478        | 0.316        | 0.467        | 0.314        | 0.587  | 0.323 |
| PEMS03   | <b>0.167</b> | <b>0.263</b> | 0.180        | 0.279        | <b>0.173</b> | <b>0.265</b> | 0.184        | 0.285        | 0.191        | 0.286 | 0.217        | 0.310        | 0.188        | 0.282        | 0.202  | 0.324 |
| PEMS04   | <b>0.192</b> | <b>0.295</b> | 0.210        | 0.306        | <b>0.201</b> | <b>0.297</b> | 0.214        | 0.311        | 0.222        | 0.315 | 0.233        | 0.331        | 0.219        | 0.312        | 0.236  | 0.338 |
| PEMS07   | <b>0.156</b> | 0.271        | 0.172        | <b>0.270</b> | 0.168        | <b>0.264</b> | 0.181        | 0.283        | <b>0.165</b> | 0.272 | 0.199        | 0.305        | 0.176        | 0.278        | 0.213  | 0.317 |
| PEMS08   | <b>0.231</b> | <b>0.309</b> | 0.238        | 0.310        | <b>0.234</b> | <b>0.306</b> | 0.240        | 0.311        | 0.255        | 0.318 | 0.282        | 0.347        | 0.251        | 0.315        | 0.266  | 0.332 |

Table 2: The ablation study comparing HyperTime with HyperTime-CNN and HyperTime-Trans, to evaluate the performance impact of replacing the MLP with CNN or Transformer.

| Model                  | HyperTime    |              | HyperTime-CNN |              | HyperTime-Trans |              |
|------------------------|--------------|--------------|---------------|--------------|-----------------|--------------|
| Metric                 | MSE          | MAE          | MSE           | MAE          | MSE             | MAE          |
| ETTh1 (7 channels)     | <b>0.438</b> | <b>0.433</b> | <b>0.438</b>  | <b>0.434</b> | 0.440           | 0.436        |
| Exchange (8 channels)  | <b>0.348</b> | <b>0.395</b> | <b>0.349</b>  | <b>0.395</b> | 0.352           | 0.399        |
| Weather (21 channels)  | <b>0.251</b> | <b>0.274</b> | <b>0.249</b>  | <b>0.275</b> | 0.253           | 0.276        |
| ECL (321 channels)     | <b>0.179</b> | <b>0.274</b> | 0.180         | <b>0.274</b> | <b>0.176</b>    | <b>0.272</b> |
| Traffic (862 channels) | <b>0.453</b> | <b>0.305</b> | 0.455         | 0.306        | <b>0.447</b>    | <b>0.301</b> |

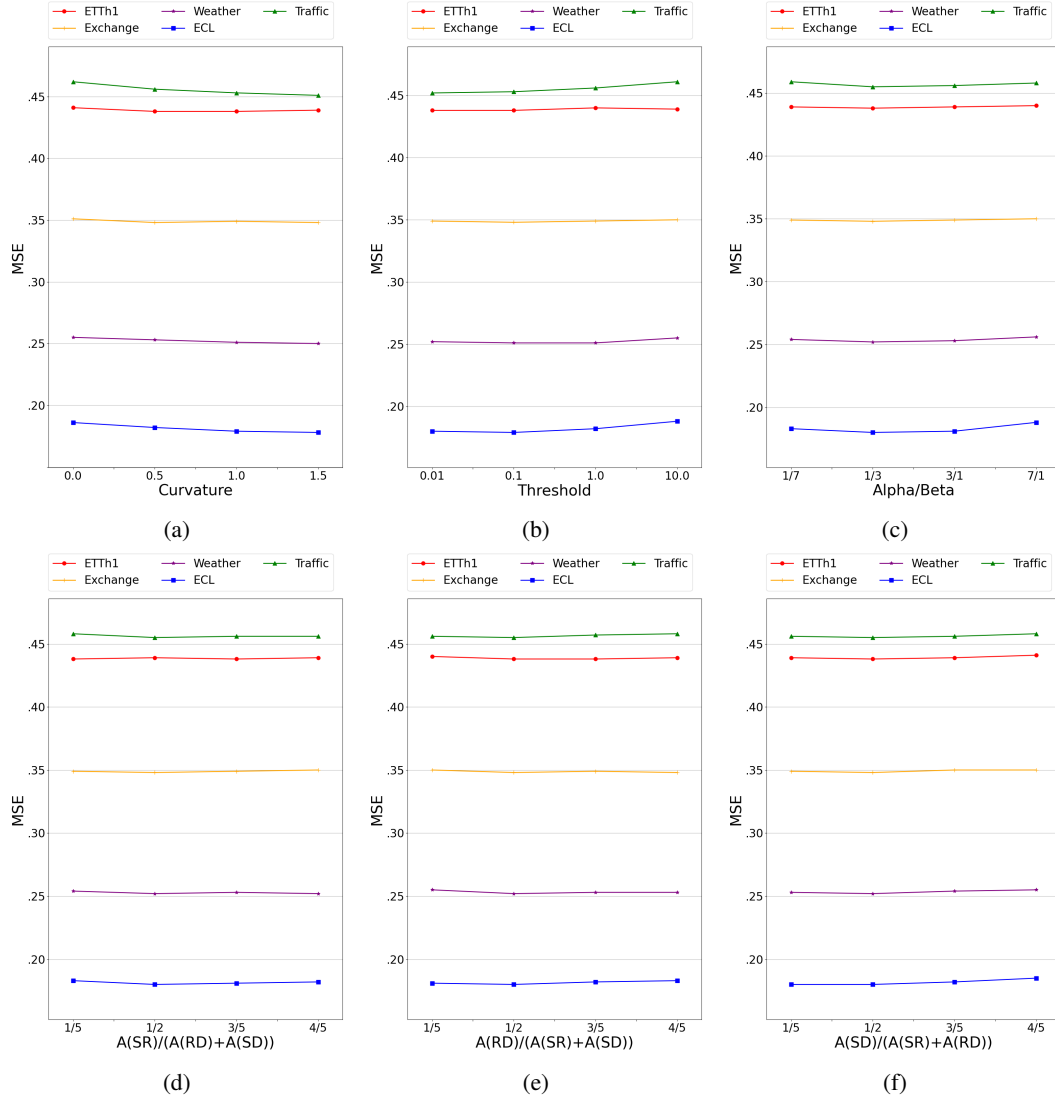

Figure 2: Analysis of the hyperbolic hyperparameters. Note that the curvature is inherently negative, we just present its absolute value.

Table 3: The results of all prediction horizons:  $H \in \{96, 192, 336, 720\}$ . The best results are shown in **bold**, and the second-best results are underlined.

| Model                 |     | HyperTime    |              | TimeXer      |              | SOFTS        |              | TimeMixer    |              | iTransformer |              | PatchTST     |              | TimesNet |       | MSGNet |       |
|-----------------------|-----|--------------|--------------|--------------|--------------|--------------|--------------|--------------|--------------|--------------|--------------|--------------|--------------|----------|-------|--------|-------|
| Metric                |     | MSE          | MAE          | MSE      | MAE   | MSE    | MAE   |
| ETTh1                 | 96  | <b>0.379</b> | <u>0.394</u> | 0.386        | <u>0.397</u> | 0.390        | 0.403        | 0.405        | 0.413        | 0.386        | 0.400        | <u>0.382</u> | 0.399        | 0.417    | 0.425 | 0.415  | 0.428 |
|                       | 192 | <u>0.428</u> | <b>0.424</b> | 0.439        | <u>0.429</u> | 0.442        | 0.433        | 0.457        | 0.442        | <b>0.437</b> | 0.430        | 0.452        | 0.437        | 0.470    | 0.458 | 0.471  | 0.457 |
|                       | 336 | <b>0.473</b> | <b>0.448</b> | 0.480        | <u>0.453</u> | 0.488        | 0.458        | 0.503        | 0.466        | 0.481        | 0.456        | <u>0.478</u> | 0.461        | 0.521    | 0.495 | 0.532  | 0.501 |
|                       | 720 | <b>0.473</b> | <b>0.466</b> | 0.496        | 0.482        | 0.507        | 0.492        | 0.516        | 0.494        | <u>0.483</u> | <u>0.477</u> | 0.491        | 0.483        | 0.684    | 0.597 | 0.569  | 0.545 |
| ETTh2                 | 96  | <b>0.288</b> | <b>0.338</b> | 0.291        | <u>0.342</u> | 0.294        | 0.347        | 0.292        | 0.343        | 0.291        | 0.345        | <u>0.289</u> | 0.343        | 0.362    | 0.382 | 0.309  | 0.361 |
|                       | 192 | <u>0.375</u> | <b>0.389</b> | <b>0.376</b> | 0.396        | 0.383        | 0.400        | 0.387        | 0.399        | 0.379        | 0.398        | 0.381        | <u>0.395</u> | 0.407    | 0.414 | 0.402  | 0.413 |
|                       | 336 | <b>0.416</b> | <b>0.424</b> | 0.429        | 0.436        | <u>0.424</u> | 0.435        | 0.427        | <u>0.434</u> | 0.425        | 0.434        | 0.427        | 0.440        | 0.455    | 0.452 | 0.438  | 0.449 |
|                       | 720 | <b>0.418</b> | <b>0.438</b> | 0.438        | 0.449        | 0.428        | 0.446        | 0.430        | 0.446        | <u>0.426</u> | <u>0.446</u> | 0.434        | 0.453        | 0.463    | 0.467 | 0.446  | 0.461 |
| ETTm1                 | 96  | <b>0.317</b> | <b>0.356</b> | 0.327        | <u>0.364</u> | 0.331        | 0.367        | <u>0.325</u> | 0.365        | 0.342        | 0.375        | 0.329        | 0.367        | 0.349    | 0.385 | 0.351  | 0.392 |
|                       | 192 | <b>0.365</b> | <b>0.383</b> | <u>0.367</u> | 0.385        | 0.373        | 0.388        | 0.377        | <u>0.385</u> | 0.382        | 0.393        | 0.369        | 0.390        | 0.401    | 0.407 | 0.393  | 0.413 |
|                       | 336 | <b>0.396</b> | <b>0.407</b> | 0.402        | 0.409        | 0.409        | 0.410        | 0.411        | <u>0.406</u> | 0.419        | 0.416        | <u>0.401</u> | 0.411        | 0.477    | 0.457 | 0.468  | 0.464 |
|                       | 720 | <b>0.453</b> | <b>0.438</b> | 0.465        | 0.446        | 0.481        | 0.450        | 0.476        | <u>0.441</u> | 0.486        | 0.454        | <u>0.462</u> | 0.445        | 0.502    | 0.469 | 0.496  | 0.473 |
| ETTm2                 | 96  | <u>0.174</u> | <b>0.256</b> | <b>0.173</b> | <u>0.259</u> | 0.181        | 0.266        | 0.188        | 0.272        | 0.181        | 0.266        | 0.178        | 0.264        | 0.184    | 0.264 | 0.190  | 0.267 |
|                       | 192 | <b>0.239</b> | <b>0.299</b> | 0.243        | <u>0.304</u> | 0.247        | 0.307        | 0.252        | 0.311        | 0.248        | 0.308        | <u>0.243</u> | 0.306        | 0.272    | 0.320 | 0.261  | 0.308 |
|                       | 336 | <b>0.298</b> | <b>0.337</b> | <u>0.304</u> | <u>0.343</u> | 0.310        | 0.347        | 0.313        | 0.349        | 0.311        | 0.348        | 0.308        | 0.348        | 0.339    | 0.358 | 0.329  | 0.350 |
|                       | 720 | <b>0.394</b> | <b>0.395</b> | <u>0.399</u> | <u>0.401</u> | 0.412        | 0.405        | 0.413        | 0.404        | 0.408        | 0.403        | 0.409        | 0.405        | 0.421    | 0.414 | 0.410  | 0.407 |
| Exchange              | 96  | <b>0.081</b> | <b>0.199</b> | 0.088        | 0.207        | 0.086        | 0.206        | <u>0.085</u> | <u>0.204</u> | 0.086        | 0.206        | 0.087        | 0.205        | 0.094    | 0.219 | 0.088  | 0.206 |
|                       | 192 | <b>0.172</b> | <b>0.293</b> | 0.184        | 0.304        | 0.180        | 0.302        | <u>0.175</u> | <u>0.297</u> | 0.178        | 0.301        | 0.183        | 0.304        | 0.195    | 0.310 | 0.180  | 0.301 |
|                       | 336 | <u>0.316</u> | <u>0.406</u> | 0.348        | 0.427        | 0.332        | 0.418        | <b>0.324</b> | <b>0.410</b> | 0.334        | 0.419        | 0.335        | 0.420        | 0.344    | 0.431 | 0.327  | 0.420 |
|                       | 720 | <b>0.824</b> | <b>0.683</b> | 0.877        | 0.704        | 0.844        | 0.692        | <u>0.834</u> | <u>0.687</u> | 0.847        | 0.695        | 0.859        | 0.698        | 0.876    | 0.705 | 0.845  | 0.702 |
| Weather               | 96  | <u>0.170</u> | <b>0.210</b> | <b>0.162</b> | <u>0.211</u> | 0.174        | 0.213        | 0.179        | 0.225        | 0.177        | 0.219        | 0.174        | 0.215        | 0.174    | 0.221 | 0.175  | 0.219 |
|                       | 192 | <u>0.217</u> | <u>0.252</u> | <b>0.209</b> | <b>0.252</b> | 0.221        | 0.255        | 0.224        | 0.262        | 0.222        | 0.256        | 0.220        | 0.257        | 0.224    | 0.263 | 0.222  | 0.253 |
|                       | 336 | <u>0.274</u> | <b>0.294</b> | <b>0.266</b> | <u>0.295</u> | 0.278        | 0.297        | 0.278        | 0.298        | 0.282        | 0.299        | 0.276        | 0.297        | 0.283    | 0.304 | 0.275  | 0.299 |
|                       | 720 | <u>0.352</u> | <b>0.345</b> | <b>0.345</b> | <u>0.346</u> | 0.356        | 0.348        | 0.356        | 0.348        | 0.358        | 0.349        | 0.353        | 0.346        | 0.366    | 0.361 | 0.354  | 0.348 |
| ECL                   | 96  | <b>0.152</b> | <b>0.245</b> | <u>0.154</u> | 0.255        | 0.161        | <u>0.249</u> | 0.184        | 0.273        | 0.158        | 0.249        | 0.183        | 0.274        | 0.166    | 0.268 | 0.187  | 0.284 |
|                       | 192 | <b>0.167</b> | 0.262        | <u>0.169</u> | 0.266        | 0.175        | 0.263        | 0.191        | 0.277        | 0.170        | <b>0.260</b> | 0.192        | 0.279        | 0.181    | 0.287 | 0.190  | 0.298 |
|                       | 336 | <b>0.182</b> | <u>0.279</u> | 0.188        | 0.284        | 0.193        | <b>0.278</b> | 0.205        | 0.294        | <u>0.187</u> | 0.279        | 0.205        | 0.296        | 0.195    | 0.299 | 0.206  | 0.305 |
|                       | 720 | <b>0.216</b> | <u>0.311</u> | 0.227        | 0.317        | 0.231        | 0.311        | 0.243        | 0.319        | <u>0.224</u> | <b>0.310</b> | 0.246        | 0.324        | 0.225    | 0.321 | 0.245  | 0.342 |
| Traffic               | 96  | <b>0.420</b> | <b>0.289</b> | 0.453        | 0.306        | 0.436        | <u>0.294</u> | 0.483        | 0.312        | <u>0.434</u> | 0.299        | 0.479        | 0.312        | 0.594    | 0.313 | 0.552  | 0.310 |
|                       | 192 | <b>0.439</b> | <b>0.297</b> | 0.471        | 0.311        | <u>0.452</u> | <u>0.301</u> | 0.489        | 0.317        | 0.454        | 0.306        | 0.485        | 0.315        | 0.615    | 0.327 | 0.558  | 0.328 |
|                       | 336 | <b>0.458</b> | <b>0.309</b> | 0.487        | 0.317        | <u>0.471</u> | <u>0.311</u> | 0.501        | 0.327        | 0.472        | 0.315        | 0.496        | 0.321        | 0.624    | 0.332 | 0.589  | 0.326 |
|                       | 720 | <b>0.494</b> | <b>0.324</b> | 0.521        | 0.335        | <u>0.505</u> | <u>0.333</u> | 0.534        | 0.344        | 0.507        | 0.337        | 0.525        | 0.339        | 0.649    | 0.341 | 0.638  | 0.340 |
| 1 <sup>st</sup> Count |     | <b>24</b>    | <b>26</b>    | <u>6</u>     | 1            | 0            | 1            | 1            | 1            | 1            | <u>2</u>     | 0            | 0            | 0        | 0     | 0      | 0     |

Table 4: Univariate short-term forecasting results, averaged across all M4 subsets.

| Model | HyperTime    | TimeMixer++  | TimePro | OLinear | TimeXer | iTransformer |
|-------|--------------|--------------|---------|---------|---------|--------------|
| SMAPE | <b>11.43</b> | <b>11.47</b> | 11.85   | 11.94   | 11.79   | 12.40        |
| MASE  | <b>1.488</b> | <b>1.502</b> | 1.637   | 1.664   | 1.625   | 1.751        |
| OWA   | <b>0.823</b> | <b>0.829</b> | 0.853   | 0.862   | 0.847   | 0.914        |
